# Supplementary material for: Ursolic acid attenuates oligospermia in busulfan-induced mice by promoting motor proteins
Source: PeerJ. 2024 Jul 5;12:e17691. doi: 10.7717/peerj.17691 (PMC11229684; doi:10.7717/peerj.17691)
Supplement: Supplemental Information 2 [file peerj-12-17691-s002.xlsx]

## Sheet: Sheet1
Testicular weight (mg)	Normal	BUS	BUS+ULA 10mg/kg	BUS+ULA 30mg/kg	BUS+ULA 50mg/kg
	128.2	22.4	45	32	67
	124.6	34.4	42	39	57
	143.7	29.4	37	45	61
	159.9	38	41	37	69
	126.1	35.4	38	34	63
	130.1	24.2	39	42	65
Sperm concentration (million/mL)	Normal	BUS	BUS+ULA 10mg/kg	BUS+ULA 30mg/kg	BUS+ULA 50mg/kg
	14.9	1	1.1	2.3	4.6
	13.8	0.9	1.9	2.1	5.1
	11.5	2	1.3	1.9	4.8
	12.8	2.1	1.7	1.2	4.2
	13.6	1.3	1.6	1.7	4.6
T concentration (ng/ml)	Normal	BUS	ULA
	17	10	12
	18	11	11
	17	9	13
	19	9	12
	17	10	12
FSH concentration (ng/ml)	Normal	BUS	ULA
	70	19	27
	68	18	29
	73	20	25
	67	16	28
	71	19	25
LH concentration (ng/ml)	Normal	BUS	ULA
	18	7	11
	17	6	10
	20	7	11
	16	5	12
	18	6	9
MDA concentration (ng/ml)	Normal	BUS	ULA
	1800	1950	1842
	1762	1961	1872
	1891	2011	1813
	1778	1988	1878
	1972	1982	1872
ROS concentration (ng/ml)	Normal	BUS	ULA
	300	450	357
	295	443	381
	287	441	375
	286	456	345
	299	447	357
